# Supplementary material
Source: publisher figshare collection journal article supplement (https://acs.figshare.com/ndownloader/files/4740397)
Supplement: Supplementary file 1 [file 4740397]

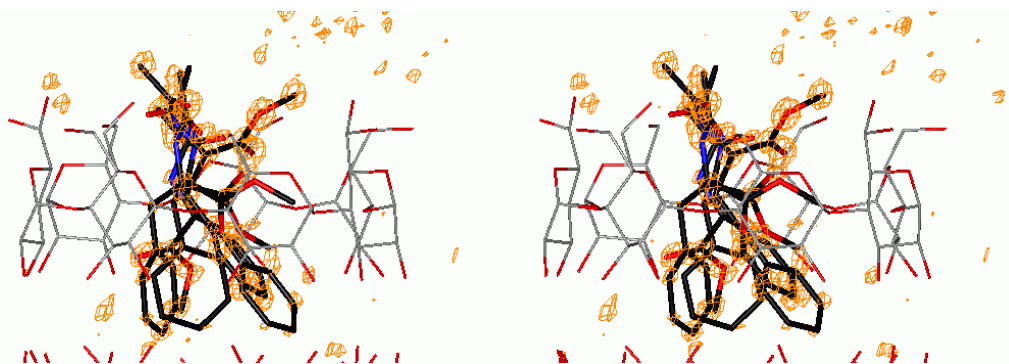

Difference electron density map calculated at  $0.4 \text{ e}^-/\text{\AA}$ , with all guests omitted from the structure factor calculation. The guest molecules are superimposed. The figure shows the varying levels of electron density at which different guest sites are observed, and also illustrates that at 20 K, atomic positions in monomer A are well-defined by almost spherical electron density peaks.
